# Supplementary material for: Discrimination Between Primary Lung Cancer and Lung Metastases by Genomic Profiling
Source: PubMed Central journal article supplement — JTO Clin Res Rep. 2021 Nov 9;2(12):100255. doi: 10.1016/j.jtocrr.2021.100255 (PMC8633675; doi:10.1016/j.jtocrr.2021.100255), 2021-11-09
Supplement: mmc2.pdf [file mmc2.pdf]

**Supplemental Table 2. Mutation data in each cancer sample**

| Case | Sample          | Gene   | Mutation     | Position        | Ref.                                                            | Tumor Var.                                                                                                                          |
|------|-----------------|--------|--------------|-----------------|-----------------------------------------------------------------|-------------------------------------------------------------------------------------------------------------------------------------|
| 1    | Gingival ca.    | TP53   | p.Met40fs    | chr17:7579565   | TCCA                                                            | TCCA/TCC                                                                                                                            |
|      | Lung tumor      | TP53   | p.Met40fs    | chr17:7579565   | TCCA                                                            | TCCA/TCC                                                                                                                            |
| 2    | Pharyngeal ca.  | TP53   | p.Pro152fs   | chr17:7578474   | CGG                                                             | CGG/C                                                                                                                               |
|      | Pharyngeal ca.  | TP53   | p.Glu343fs   | chr17:7574000   | CT                                                              | CT/C                                                                                                                                |
|      | Lung tumor      | TP53   | p.Gly334Val  | chr17:7574026   | C                                                               | C/A                                                                                                                                 |
|      | Lung tumor      | ATM    | p.Ser1857Pro | chr11:108175474 | T                                                               | T/C                                                                                                                                 |
|      | Lung tumor      | KMT2D  | p.Gly3095fs  | chr12:49431854  | GC                                                              | GC/G                                                                                                                                |
|      | Lung tumor      | FGFR3  | p.Ser249Cys  | chr4:1803568    | C                                                               | C/G                                                                                                                                 |
|      | Lung tumor      | TP53   | p.His193Arg  | chr17:7578256   | TCCACTCGGA<br>TAAGATGCTG<br>AGGAGGGG                            | TCCACTCGGA<br>TAAGATGCTG<br>AGGAGGGG/T<br>CCTACTCGGAT<br>AAGACGCTGA<br>GGAGGGG                                                      |
| 3    | Choriocarcinoma | AKT2   | p.Met404Ile  | chr19:40741221  | C                                                               | C/T                                                                                                                                 |
|      | Choriocarcinoma | EP300  | p.Met2331Thr | chr22:41574707  | T                                                               | T/C                                                                                                                                 |
|      | Choriocarcinoma | MGA    | p.Ala2261Thr | chr15:42042586  | G                                                               | G/A                                                                                                                                 |
|      | Lung tumor      | AKT2   | p.Met404Ile  | chr19:40741221  | C                                                               | C/T                                                                                                                                 |
| 4    | Pharyngeal ca.  | TP53   | p.Cys238Arg  | chr17:7577569   | A                                                               | A/G                                                                                                                                 |
|      | Esophageal ca.  | TP53   | p.Glu258Asp  | chr17:7577507   | T                                                               | T/G                                                                                                                                 |
|      | Esophageal ca.  | EPHA7  | p.Ala547Val  | chr6:93974414   | G                                                               | G/A                                                                                                                                 |
|      | Lung tumor      | KEAP1  | p.Glu493Lys  | chr19:10600378  | C                                                               | C/T                                                                                                                                 |
|      | Lung tumor      | TP53   | p.Gly244Asp  | chr17:7577550   | C                                                               | C/T                                                                                                                                 |
| 5    | Esophageal ca.  | TP53   | p.Ile254del  | chr17:7577518   | TGATGGTGAG                                                      | TGATGGTGAG<br>/TGGTGAG                                                                                                              |
|      | Esophageal ca.  | TP53   | splicing     | chr17:7578368   | CACCATCGCT<br>ATCTGAGCAG<br>CGCTCATGGT<br>GGGGGCAGC<br>GCCTCACA | CACCATCGCT<br>ATCTGAGCAG<br>CGCTCATGGT<br>GGGGGCAGC<br>GCCTCACA/C<br>ATCATCGCTA<br>TCTGAGCAGC<br>GCTCATGGTG<br>GGGGCAGCG<br>CCTCACA |
|      | Esophageal ca.  | NF1    | p.Asp2525Ala | chr17:29679391  | A                                                               | A/C                                                                                                                                 |
|      | Lung tumor      | SETD2  | p.Ala2350Thr | chr3:47088027   | C                                                               | C/T                                                                                                                                 |
|      | Lung tumor      | NFE2L2 | p.Glu82Asp   | chr2:178098799  | T                                                               | T/G                                                                                                                                 |
|      | Lung tumor      | NFE2L2 | p.Glu79Asp   | chr2:178098808  | C                                                               | C/G                                                                                                                                 |

|   |             |        |                                        |                 |                               |                                                                                                                                     |
|---|-------------|--------|----------------------------------------|-----------------|-------------------------------|-------------------------------------------------------------------------------------------------------------------------------------|
|   |             |        |                                        |                 |                               | CACCATCGCT<br>ATCTGAGCAG<br>CGCTCATGGT<br>GGGGGCAGC<br>GCCTCACA/C<br>ACCATCGCTA<br>TCTGAGCAGG<br>GCTCATGGTG<br>GGGGCAGCG<br>CCTCACA |
|   | Lung tumor  | TP53   | p.Arg181Pro                            | chr17:7578368   |                               |                                                                                                                                     |
|   | Lung tumor  | NF1    | p.Asp2525Ala                           | chr17:29679391  | A                             | A/C                                                                                                                                 |
| 6 | Gastric ca. | TP53   | p.Tyr327Ter                            | chr17:7576865   | A                             | A/T                                                                                                                                 |
|   | Gastric ca. | FGFR2  | p.Arg6Pro                              | chr10:123353315 | C                             | C/G                                                                                                                                 |
|   | Gastric ca. | NF1    | p.Leu1893Ile                           | chr17:29657381  | C                             | C/A                                                                                                                                 |
|   | Gastric ca. | KMT2A  | p.Pro2357Arg                           | chr11:118373677 | C                             | C/G                                                                                                                                 |
|   | Gastric ca. | KMT2D  | p.Cys5133fs                            | chr12:49420349  | GAC                           | GAC/G                                                                                                                               |
|   | Gastric ca. | TSC2   | p.Glu517fs                             | chr16:2114377   | AG                            | AG/A                                                                                                                                |
|   | Gastric ca. | NOTCH1 | p.Asp1185Asn                           | chr9:139401847  | C                             | C/T                                                                                                                                 |
|   | Lung tumor  | TP53   | p.Tyr220Cys                            | chr17:7578190   | T                             | T/C                                                                                                                                 |
|   | Lung tumor  | NF1    | p.Asp2525Ala                           | chr17:29679391  | A                             | A/C                                                                                                                                 |
|   | Lung tumor  | TSC2   | p.Pro903fs                             | chr16:2126134   | T                             | T/TC                                                                                                                                |
|   |             |        |                                        |                 |                               | GGAGATTCTC<br>TTCCTCTGTG<br>C/GGAGATTC<br>TCTTCCTTTGT<br>GC                                                                         |
| 7 | Gastric ca. | TP53   | p.Glu285Lys                            | chr17:7577070   | GGAGATTCTC<br>TTCCTCTGTG<br>C |                                                                                                                                     |
|   | Lung tumor  | ERBB2  | p.Glu770_Ala77<br>1insAlaTyrValMe<br>t | chr17:37880981  | A                             | A/AGCATACG<br>TGATG                                                                                                                 |
|   | Lung tumor  | TP53   | splicing                               | chr17:7574034   | C                             | C/G                                                                                                                                 |
|   | Lung tumor  | TP53   | p.Tyr220Cys                            | chr17:7578190   | T                             | T/C                                                                                                                                 |
|   | Lung tumor  | TP53   | p.Arg213Ter                            | chr17:7578212   | GAA                           | GAA/AAA                                                                                                                             |
| 8 | Gastric ca. | TP53   | p.Tyr220Cys                            | chr17:7578190   | T                             | T/C                                                                                                                                 |
|   | Gastric ca. | ATM    | p.Glu2660Ala                           | chr11:108204664 | A                             | A/C                                                                                                                                 |
|   | Gastric ca. | PTEN   | p.Arg47Gly                             | chr10:89653841  | A                             | A/G                                                                                                                                 |
|   | Lung tumor  | RB1    | splicing                               | chr13:48955580  | G                             | G/A                                                                                                                                 |
|   | Lung tumor  | TP53   | p.Arg158Pro                            | chr17:7578452   | TGGCGCG                       | TGGCGCG/TG<br>GCGGG                                                                                                                 |
|   | Lung tumor  | ARID2  | p.Pro1093Arg                           | chr12:46245184  | C                             | C/G                                                                                                                                 |
|   | Lung tumor  | KMT2D  | p.Gly3633Asp                           | chr12:49427590  | C                             | C/T                                                                                                                                 |
|   | Lung tumor  | CREBBP | p.Glu1040_Gln1<br>041delinsAspTer      | chr16:3817850   | GC                            | GC/AA                                                                                                                               |
| 9 | Lung ca.    | KRAS   | p.Gly12Val                             | chr12:25398284  | C                             | C/A                                                                                                                                 |
|   | Lung ca.    | ATM    | p.Ile2629fs                            | chr11:108203577 | CTTATA                        | CTTATA/C                                                                                                                            |
|   | Lung ca.    | EPHA7  | p.Thr66Ile                             | chr6:94120854   | G                             | G/A                                                                                                                                 |
|   | Lung ca.    | SETD2  | p.Ser557Phe                            | chr3:47164456   | G                             | G/A                                                                                                                                 |
|   | Lung ca.    | KMT2A  | p.Pro553Arg                            | chr11:118343532 | C                             | C/G                                                                                                                                 |
|   | Lung ca.    | FGFR2  | p.Lys193Thr                            | chr10:123310850 | T                             | T/G                                                                                                                                 |

|    |                |         |                             |                 |        |               |
|----|----------------|---------|-----------------------------|-----------------|--------|---------------|
|    | Lung ca.       | KMT2A   | p.Gly932Arg                 | chr11:118344668 | G      | G/A           |
|    | Lung ca.       | ERBB2   | p.Asp421Val                 | chr17:37871738  | A      | A/T           |
|    | Lung ca.       | MGA     | p.Phe665Cys                 | chr15:41989202  | T      | T/G           |
|    | Lung ca.       | EP300   | p.Met126Arg                 | chr22:41513473  | T      | T/G           |
|    | Lung ca.       | KMT2A   | p.Ser2614Phe                | chr11:118374448 | C      | C/T           |
|    | Lung ca.       | ARID1A  | p.Pro554Thr                 | chr1:27057952   | C      | C/A           |
|    | Pancreatic ca. | NOTCH1  | p.His1840Arg                | chr9:139396319  | T      | T/C           |
|    | Pancreatic ca. | KMT2D   | p.Asp632Glu                 | chr12:49445570  | G      | G/C           |
|    | RU_Lung tumor  | NOTCH1  | p.His1840Arg                | chr9:139396319  | T      | T/C           |
|    | RU_Lung tumor  | KMT2D   | p.Asp632Glu                 | chr12:49445570  | G      | G/C           |
|    | RU_Lung tumor  | FGFR3   | p.Ala634Thr                 | chr4:1807841    | G      | G/A           |
|    | RU_Lung tumor  | SMARCA4 | p.Ser1167Leu                | chr19:11141523  | C      | C/T           |
|    | RU_Lung tumor  | ARID1B  | p.Asn111His                 | chr6:157099394  | A      | A/C           |
|    | RU_Lung tumor  | ARID1B  | p.Asn111Lys                 | chr6:157099396  | C      | C/G           |
|    | RM_Lung tumor  | NOTCH1  | p.His1840Arg                | chr9:139396319  | T      | T/C           |
|    | RM_Lung tumor  | KMT2D   | p.Asp632Glu                 | chr12:49445570  | G      | G/C           |
|    | RM_Lung tumor  | FGFR3   | p.Ala634Thr                 | chr4:1807841    | G      | G/A           |
| 10 | Colorectal ca. | TP53    | p.Arg342Ter                 | chr17:7574002   | CG     | CG/CA         |
|    | Colorectal ca. | SMAD4   | p.Leu364Trp                 | chr18:48591928  | T      | T/G           |
|    | Colorectal ca. | EP300   | p.Ser1193Thr                | chr22:41554492  | G      | G/C           |
|    | Colorectal ca. | SMARCA4 | p.Gln1236Glu                | chr19:11144125  | C      | C/G           |
|    | L_Lung tumor   | TP53    | p.Arg342Ter                 | chr17:7574002   | CG     | CG/CA         |
|    | L_Lung tumor   | SMAD4   | p.Phe329Ile                 | chr18:48591822  | T      | T/A           |
|    | L_Lung tumor   | SMAD4   | p.Phe329_Glu330delinsLeuLys | chr18:48591824  | TG     | TG/AA         |
| 11 | Colorectal ca. | TP53    | p.Arg342Ter                 | chr17:7574002   | CG     | CG/CA         |
|    | Colorectal ca. | SMAD4   | p.Leu364Trp                 | chr18:48591928  | T      | T/G           |
|    | Colorectal ca. | EP300   | p.Ser1193Thr                | chr22:41554492  | G      | G/C           |
|    | Colorectal ca. | SMARCA4 | p.Gln1236Glu                | chr19:11144125  | C      | C/G           |
|    | R_Lung tumor   | TP53    | p.Arg342Ter                 | chr17:7574002   | CG     | CG/CA         |
|    | R_Lung tumor   | KMT2D   | p.Arg1614Trp                | chr12:49438650  | G      | G/A           |
| 12 | Colorectal ca. | TP53    | p.Arg273His                 | chr17:7577120   | CG     | CG/TG         |
|    | Colorectal ca. | ERBB2   | p.Val697Met                 | chr17:37879794  | G      | G/A           |
|    | Colorectal ca. | MAP2K1  | p.Pro124Leu                 | chr15:66729163  | C      | C/T           |
|    | Colorectal ca. | KRAS    | p.Gly12Ser                  | chr12:25398280  | GCCACC | GCCACC/GCCACT |
|    | Lung tumor     | TP53    | p.Arg273His                 | chr17:7577120   | CG     | CG/TG         |
|    | Lung tumor     | ERBB2   | p.Val697Met                 | chr17:37879794  | G      | G/A           |
|    | Lung tumor     | MAP2K1  | p.Pro124Leu                 | chr15:66729163  | C      | C/T           |

|    |                |        |                        |                |                                      |                                                                               |
|----|----------------|--------|------------------------|----------------|--------------------------------------|-------------------------------------------------------------------------------|
|    | Lung tumor     | KRAS   | p.Gly12Ser             | chr12:25398280 | GCCACC                               | GCCACC/GCC<br>ACT                                                             |
| 13 | Colorectal ca. | TP53   | p.Arg273Cys            | chr17:7577120  | CG                                   | CG/CA                                                                         |
|    | Colorectal ca. | MAP2K1 | p.Glu102_Ile103<br>del | chr15:66729093 | CTGGAGA                              | CTGGAGA/C                                                                     |
|    | Colorectal ca. | EP300  | p.Gly1269Arg           | chr22:41560133 | G                                    | G/A                                                                           |
|    | R_Lung tumor   | TP53   | p.Arg273Cys            | chr17:7577120  | CG                                   | CG/CA                                                                         |
|    | R_Lung tumor   | MAP2K1 | p.Glu102_Ile103<br>del | chr15:66729093 | CTGGAGA                              | CTGGAGA/C                                                                     |
|    | R_Lung tumor   | SLIT2  | p.Pro29Leu             | chr4:20255524  | C                                    | C/T                                                                           |
| 14 | Colorectal ca. | TP53   | p.Arg273Cys            | chr17:7577120  | CG                                   | CG/CA                                                                         |
|    | Colorectal ca. | MAP2K1 | p.Glu102_Ile103<br>del | chr15:66729093 | CTGGAGA                              | CTGGAGA/C                                                                     |
|    | Colorectal ca. | EP300  | p.Gly1269Arg           | chr22:41560133 | G                                    | G/A                                                                           |
|    | L_Lung tumor   | TP53   | p.Arg273Cys            | chr17:7577120  | CG                                   | CG/CA                                                                         |
|    | L_Lung tumor   | MAP2K1 | p.Glu102_Ile103<br>del | chr15:66729093 | CTGGAGA                              | CTGGAGA/C                                                                     |
| 15 | Colorectal ca. | TP53   | p.Arg213Ter            | chr17:7578211  | CG                                   | CG/CA                                                                         |
|    | Colorectal ca. | FGFR1  | p.Ser140Leu            | chr8:38287238  | G                                    | G/A                                                                           |
|    | Colorectal ca. | NRAS   | p.Gln61Arg             | chr1:115256528 | TT                                   | TT/TC                                                                         |
|    | Lung tumor     | TP53   | p.Arg213Ter            | chr17:7578211  | CG                                   | CG/CA                                                                         |
|    | Lung tumor     | FGFR1  | p.Ser140Leu            | chr8:38287238  | G                                    | G/A                                                                           |
|    | Lung tumor     | NRAS   | p.Gln61Arg             | chr1:115256528 | TT                                   | TT/TC                                                                         |
| 16 | Colorectal ca. | KRAS   | p.Gly12Ser             | chr12:25398280 | GCCACC                               | GCCACC/GCC<br>ACT                                                             |
|    | Colorectal ca. | TP53   | p.Tyr236Cys            | chr17:7577572  | TGTA                                 | TGTA/TGCA                                                                     |
|    | Colorectal ca. | PIK3CA | p.Glu545Lys            | chr3:178936091 | G                                    | G/A                                                                           |
|    | R_Lung tumor   | KRAS   | p.Gly12Ser             | chr12:25398280 | GCCACC                               | GCCACC/GCC<br>ACT                                                             |
|    | R_Lung tumor   | TP53   | p.Tyr236Cys            | chr17:7577572  | TGTA                                 | TGTA/TGCA                                                                     |
|    | R_Lung tumor   | PIK3CA | p.Glu545Lys            | chr3:178936091 | G                                    | G/A                                                                           |
| 17 | Colorectal ca. | KRAS   | p.Gly12Ser             | chr12:25398280 | GCCACC                               | GCCACC/GCC<br>ACT                                                             |
|    | Colorectal ca. | TP53   | p.Tyr236Cys            | chr17:7577572  | TGTA                                 | TGTA/TGCA                                                                     |
|    | Colorectal ca. | PIK3CA | p.Glu545Lys            | chr3:178936091 | G                                    | G/A                                                                           |
|    | L_Lung tumor   | KRAS   | p.Gly12Ser             | chr12:25398280 | GCCACC                               | GCCACC/GCC<br>ACT                                                             |
|    | L_Lung tumor   | TP53   | p.Tyr236Cys            | chr17:7577572  | TGTA                                 | TGTA/TGCA                                                                     |
|    | L_Lung tumor   | PIK3CA | p.Glu545Lys            | chr3:178936091 | G                                    | G/A                                                                           |
| 18 | Colorectal ca. | TP53   | p.Leu194Arg            | chr17:7578256  | TCCACTCGGA<br>TAAGATGCTG<br>AGGAGGGG | TCCACTCGGA<br>TAAGATGCTG<br>AGGAGGGG/T<br>CCACTCGGAT<br>ACGATGCTGA<br>GGAGGGG |

|    |                |        |              |                |                                                                 |                                                                                                                                     |
|----|----------------|--------|--------------|----------------|-----------------------------------------------------------------|-------------------------------------------------------------------------------------------------------------------------------------|
|    | Lung tumor     | TP53   | p.Leu194Arg  | chr17:7578256  | TCCACTCGGA<br>TAAGATGCTG<br>AGGAGGGG                            | TCCACTCGGA<br>TAAGATGCTG<br>AGGAGGGG/T<br>CCTACTCGGAT<br>ACGATGCTGA<br>GGAGGGG                                                      |
|    | Lung tumor     | NOTCH2 | Splicesite   | chr1:120480633 | TC                                                              | TC/AA                                                                                                                               |
|    | Lung tumor     | NF1    | p.Leu2325Arg | chr17:29667575 | T                                                               | T/G                                                                                                                                 |
| 19 | Colorectal ca. | TP53   | p.Cys176Phe  | chr17:7578368  | CACCATCGCT<br>ATCTGAGCAG<br>CGCTCATGGT<br>GGGGGCAGC<br>GCCTCACA | CACCATCGCT<br>ATCTGAGCAG<br>CGCTCATGGT<br>GGGGGCAGC<br>GCCTCACA/C<br>ACCATCGCTA<br>TCTGAGCAGC<br>GCTCATGGTG<br>GGGGAAGCG<br>CCTCACA |
|    | Colorectal ca. | KRAS   | p.Gly12Val   | chr12:25398280 | GCCAC                                                           | GCCAC/GCCA<br>A                                                                                                                     |
|    | R_Lung tumor   | TP53   | p.Cys176Phe  | chr17:7578368  | CACCATCGCT<br>ATCTGAGCAG<br>CGCTCATGGT<br>GGGGGCAGC<br>GCCTCACA | CACCATCGCT<br>ATCTGAGCAG<br>CGCTCATGGT<br>GGGGGCAGC<br>GCCTCACA/C<br>ACCATCGCTA<br>TCTGAGCAGC<br>GCTCATGGTG<br>GGGGAAGCG<br>CCTCACA |
|    | R_Lung tumor   | KRAS   | p.Gly12Val   | chr12:25398280 | GCCAC                                                           | GCCAC/GCCA<br>A                                                                                                                     |
|    | R_Lung tumor   | PIK3CA | p.Asn183Lys  | chr3:178917674 | T                                                               | T/A                                                                                                                                 |
| 20 | Colorectal ca. | TP53   | p.Cys176Phe  | chr17:7578368  | CACCATCGCT<br>ATCTGAGCAG<br>CGCTCATGGT<br>GGGGGCAGC<br>GCCTCACA | CACCATCGCT<br>ATCTGAGCAG<br>CGCTCATGGT<br>GGGGGCAGC<br>GCCTCACA/C<br>ACCATCGCTA<br>TCTGAGCAGC<br>GCTCATGGTG<br>GGGGAAGCG<br>CCTCACA |
|    | Colorectal ca. | KRAS   | p.Gly12Val   | chr12:25398280 | GCCAC                                                           | GCCAC/GCCA<br>A                                                                                                                     |

|    |                |                   |              |                |       |                                                                                                                                     |
|----|----------------|-------------------|--------------|----------------|-------|-------------------------------------------------------------------------------------------------------------------------------------|
|    |                |                   |              |                |       | CACCATCGCT<br>ATCTGAGCAG<br>CGCTCATGGT<br>GGGGGCAGC<br>GCCTCACA/C<br>ACCATCGCTA<br>TCTGAGCAGC<br>GCTCATGGTG<br>GGGGAAGCG<br>CCTCACA |
|    | L_Lung tumor   | TP53              | p.Cys176Phe  | chr17:7578368  |       |                                                                                                                                     |
|    | L_Lung tumor   | KRAS              | p.Gly12Val   | chr12:25398280 | GCCAC | GCCAC/GCCA<br>A                                                                                                                     |
|    | L_Lung tumor   | PIK3CA            | p.Glu545Lys  | chr3:178936091 | G     | G/A                                                                                                                                 |
| 21 | Colorectal ca. | TP53              | p.Arg213Ter  | chr17:7578211  | CG    | CG/CA                                                                                                                               |
|    | Colorectal ca. | SMAD4             | p.Ala406Val  | chr18:48593466 | C     | C/T                                                                                                                                 |
|    | Colorectal ca. | SMARCA4           | p.Arg13Pro   | chr19:11094865 | G     | G/C                                                                                                                                 |
|    | Colorectal ca. | BRAF              | p.Val600Glu  | chr7:140453133 | TTCA  | TTCA/TTCT                                                                                                                           |
|    | Colorectal ca. | MGA               | p.Arg2436Cys | chr15:42052635 | C     | C/T                                                                                                                                 |
|    | Colorectal ca. | FOXP2 MI<br>R3666 | p.Lys422Asn  | chr7:114293989 | A     | A/T                                                                                                                                 |
|    | Colorectal ca. | ARID1A            | p.Gln1401Ter | chr1:27100919  | C     | C/T                                                                                                                                 |
|    | Colorectal ca. | ARID2             | p.Asp211Tyr  | chr12:46211665 | G     | G/T                                                                                                                                 |
|    | Colorectal ca. | PIK3CA            | p.Glu545Lys  | chr3:178936091 | G     | G/A                                                                                                                                 |
|    | Colorectal ca. | COBL              | p.Arg334Gln  | chr7:51152958  | C     | C/T                                                                                                                                 |
|    | Lung tumor     | TP53              | p.Arg213Ter  | chr17:7578211  | CG    | CG/CA                                                                                                                               |
|    | Lung tumor     | SMAD4             | p.Ala406Val  | chr18:48593466 | C     | C/T                                                                                                                                 |
|    | Lung tumor     | SMARCA4           | p.Arg13Pro   | chr19:11094865 | G     | G/C                                                                                                                                 |
|    | Lung tumor     | BRAF              | p.Val600Glu  | chr7:140453133 | TTCA  | TTCA/TTCT                                                                                                                           |
|    | Lung tumor     | MGA               | p.Arg2436Cys | chr15:42052635 | C     | C/T                                                                                                                                 |
|    | Lung tumor     | FOXP2 MI<br>R3666 | p.Lys422Asn  | chr7:114293989 | A     | A/T                                                                                                                                 |
|    | Lung tumor     | ARID1A            | p.Gln1401Ter | chr1:27100919  | C     | C/T                                                                                                                                 |
|    | Lung tumor     | ARID2             | p.Asp211Tyr  | chr12:46211665 | G     | G/T                                                                                                                                 |
|    | Lung tumor     | PIK3CA            | p.Glu545Lys  | chr3:178936091 | G     | G/A                                                                                                                                 |
| 22 | Rectal ca.     | COBL              | p.Met1114Lys | chr7:51095452  | A     | A/T                                                                                                                                 |
|    | Rectal ca.     | TP53              | p.Arg342Ter  | chr17:7574002  | CG    | CG/CA                                                                                                                               |
|    | Rectal ca.     | ERBB3             | p.Gly216Ala  | chr12:56481612 | G     | G/C                                                                                                                                 |
|    | Lung tumor     | COBL              | p.Met1114Lys | chr7:51095452  | A     | A/T                                                                                                                                 |
|    | Lung tumor     | TP53              | p.Arg342Ter  | chr17:7574002  | CG    | CG/CA                                                                                                                               |
|    | Lung tumor     | ERBB3             | p.Gly216Ala  | chr12:56481612 | G     | G/C                                                                                                                                 |
| 23 | Cervical ca.   | PIK3CA            | p.Cys378Tyr  | chr3:178922364 | G     | G/A                                                                                                                                 |

|    |                |                   |              |                |                      |                                                                                                                                     |
|----|----------------|-------------------|--------------|----------------|----------------------|-------------------------------------------------------------------------------------------------------------------------------------|
|    |                |                   |              |                |                      | CACCATCGCT<br>ATCTGAGCAG<br>CGCTCATGGT<br>GGGGGCAGC<br>GCCTCACA/C<br>ACCATCGCTA<br>TCTGAGCAGC<br>GCTCATGGTG<br>GGGGCAGTG<br>CCTCACA |
|    | Cervical ca.   | TP53              | p.Arg175His  | chr17:7578368  |                      |                                                                                                                                     |
|    | Cervical ca.   | U2AF1 U2<br>AF1L5 | p.Ser34Phe   | chr21:44524456 | G                    | G/A                                                                                                                                 |
|    | Lung tumor     | PIK3CA            | p.Cys378Tyr  | chr3:178922364 | G                    | G/A                                                                                                                                 |
|    |                |                   |              |                |                      | CACCATCGCT<br>ATCTGAGCAG<br>CGCTCATGGT<br>GGGGGCAGC<br>GCCTCACA/C<br>ACCATCGCTA<br>TCTGAGCAGC<br>GCTCATGGTG<br>GGGGCAGTG<br>CCTCACA |
|    | Lung tumor     | TP53              | p.Arg175His  | chr17:7578368  |                      |                                                                                                                                     |
|    |                |                   |              |                |                      | CACCATCGCT<br>ATCTGAGCAG<br>CGCTCATGGT<br>GGGGGCAGC<br>GCCTCACA                                                                     |
|    | Lung tumor     | U2AF1 U2<br>AF1L5 | p.Ser34Phe   | chr21:44524456 | G                    | G/A                                                                                                                                 |
| 24 | Urothelial ca. | TP53              | p.Arg248Gln  | chr17:7577528  | GATGGGCCTC<br>CGGTTC | GATGGGCCTC<br>CGGTTC/GAT<br>GGGCCTCTG<br>GTTC                                                                                       |
|    | Urothelial ca. | MGA               | p.Ile1429Met | chr15:42028749 | C                    | C/G                                                                                                                                 |
|    | Urothelial ca. | ARID1B            | p.Ala240Glu  | chr6:157099782 | C                    | C/A                                                                                                                                 |
|    | Urothelial ca. | ARID2             | p.Ser863Leu  | chr12:46244494 | C                    | C/T                                                                                                                                 |
|    |                |                   |              |                |                      | GATGGGCCTC<br>CGGTTC/GAT<br>GGGCCTCTG<br>GTTC                                                                                       |
|    | Lung tumor     | TP53              | p.Arg248Gln  | chr17:7577528  | GATGGGCCTC<br>CGGTTC | GATGGGCCTC<br>CGGTTC/GAT<br>GGGCCTCTG<br>GTTC                                                                                       |
|    | Lung tumor     | MGA               | p.Ile1429Met | chr15:42028749 | C                    | C/G                                                                                                                                 |
|    | Lung tumor     | ARID1B            | p.Ala240Glu  | chr6:157099782 | C                    | C/A                                                                                                                                 |
|    | Lung tumor     | ARID2             | p.Ser863Leu  | chr12:46244494 | C                    | C/T                                                                                                                                 |
|    | Lung tumor     | ARID2             | p.Ser907Leu  | chr12:46244626 | C                    | C/T                                                                                                                                 |
|    | Lung tumor     | ARID2             | p.Gln760His  | chr12:46244186 | G                    | G/C                                                                                                                                 |
|    | Lung tumor     | NOTCH2            | p.Pro1309Ala | chr1:120469202 | G                    | G/C                                                                                                                                 |
